# Supplementary material for: Association of Sex or Race With the Effect of Weight Loss on Physical Function: A Secondary Analysis of 8 Randomized Clinical Trials
Source: PubMed Central journal article supplement (PMC7442923; doi:10.1001/jamanetworkopen.2020.14631), 2020-08-21
Supplement: jamanetwopen-3-e2014631-s001.pdf [file jamanetwopen-3-e2014631-s001.pdf]

## Supplementary Online Content

Beavers KM, Neiberg RH, Kritchevsky SB, et al. Association of sex or race with the effect of weight loss on physical function: a secondary analysis of 8 randomized clinical trials. *JAMA Netw Open*. 2020;3(8):e2014631. doi:10.1001/jamanetworkopen.2020.14631

**eTable 1.** Baseline Demographic Characteristics by Sex

**eTable 2.** Baseline Demographic Characteristics by Race

**eTable 3.** Type III Tests of 3-Way Interactions for Sensitivity Analyses Involving Exercise

This supplementary material has been provided by the authors to give readers additional information about their work.

**eTable 1.** Baseline Demographic Characteristics by Sex

| <b>Variable</b>                       | <b>Overall<br/>(N=1317)</b> | <b>Male<br/>(N=397)</b> | <b>Female<br/>(N=920)</b> | <b>p-value</b> |
|---------------------------------------|-----------------------------|-------------------------|---------------------------|----------------|
| Age (years)                           | 67.7 ± 5.4                  | 68.0 ± 5.0              | 67.5 ± 5.5                | 0.10           |
| Caloric Restriction Assignment, n (%) | 734 (55.7)                  | 213 (53.7)              | 521 (56.6)                | 0.32           |
| Race, n (%)                           |                             |                         |                           | <0.001         |
| White                                 | 1042 (79.1)                 | 360 (90.7)              | 682 (74.1)                |                |
| Black                                 | 275 (20.9)                  | 37 (9.3)                | 238 (25.9)                |                |
| Education, n (%)                      |                             |                         |                           | <0.001         |
| Primary/Secondary Only                | 255 (19.4)                  | 68 (17.1)               | 187 (20.3)                |                |
| College Graduate                      | 780 (59.2)                  | 213 (53.7)              | 567 (61.6)                |                |
| Post College Graduate                 | 282 (21.4)                  | 116 (29.2)              | 166 (18.0)                |                |
| BMI (kg/m <sup>2</sup> )              | 33.9 ± 4.4                  | 33.5 ± 3.7              | 34.1 ± 4.7                | 0.02           |
| Comorbidities, n (%)                  |                             |                         |                           |                |
| Diabetes                              | 188 (14.3)                  | 55 (13.9)               | 133 (14.5)                | 0.77           |
| Hypertension                          | 768 (58.3)                  | 236 (59.4)              | 532 (57.8)                | 0.58           |
| CVD History                           | 448 (34.0)                  | 151 (38.0)              | 297 (32.3)                | 0.04           |
| Physical Function Assessments         |                             |                         |                           |                |
| Fast Gait Speed (m/s)                 | 1.2 ± 0.2                   | 1.3 ± 0.2               | 1.2 ± 0.2                 | <0.001         |
| SPPB (0-12 score)                     | 10.4 ± 1.5                  | 10.7 ± 1.3              | 10.3 ± 1.5                | <0.001         |
| DXA Body Composition Measures         |                             |                         |                           |                |
| Total Fat Mass (kg)                   | 38.0 ± 8.7                  | 33.8 ± 7.9              | 39.8 ± 8.3                | <0.001         |
| Total Lean Mass (kg)                  | 53.2 ± 11.1                 | 67.0 ± 7.3              | 47.2 ± 6.0                | <0.001         |
| Percentage Body Fat (%)               | 40.7 ± 7.1                  | 32.4 ± 4.8              | 44.4 ± 4.2                | <0.001         |

Data presented as mean ± SD or n (%). Abbreviations: BMI = body mass index; CVD = cardiovascular disease; DXA = dual energy x-ray absorptiometry; SPPB = short physical performance battery. Baseline samples sizes associated with individual outcome measures are as follows: Fast gait speed n=1245, SPPB n=853, and DXA-acquired body composition n=360.

**eTable 2.** Baseline Demographic Characteristics by Race

| Variable                              | Overall<br>(N=1317) | White<br>(N=1042) | Black<br>(N=275) | <i>p</i> -value |
|---------------------------------------|---------------------|-------------------|------------------|-----------------|
| Age (years)                           | 67.7 ± 5.4          | 67.7 ± 5.3        | 67.6 ± 5.5       | 0.78            |
| Caloric Restriction Assignment, n (%) | 734 (55.7)          | 574 (55.1)        | 160 (58.2)       | 0.36            |
| Sex, n (%)                            |                     |                   |                  | <0.001          |
| Female                                | 920 (69.9)          | 682 (65.5)        | 238 (86.5)       |                 |
| Male                                  | 397 (30.1)          | 360 (34.5)        | 37 (13.5)        |                 |
| Education, n (%)                      |                     |                   |                  | 0.80            |
| Primary/Secondary Only                | 255 (19.4)          | 198 (19.0)        | 57 (20.7)        |                 |
| College Graduate                      | 780 (59.2)          | 619 (59.4)        | 161 (58.5)       |                 |
| Post College Graduate                 | 282 (21.4)          | 225 (21.6)        | 57 (20.7)        |                 |
| BMI (kg/m <sup>2</sup> )              | 33.9 ± 4.4          | 33.4 ± 4.0        | 36.0 ± 5.1       | <0.001          |
| Comorbidities                         |                     |                   |                  |                 |
| Diabetes                              | 188 (14.3)          | 122 (11.7)        | 66 (24.0)        | <0.001          |
| Hypertension                          | 768 (58.3)          | 565 (54.2)        | 203 (73.8)       | <0.001          |
| CVD History                           | 448 (34.0)          | 350 (33.6)        | 98 (35.6)        | 0.52            |
| Physical Function Assessments         |                     |                   |                  |                 |
| Fast Gait Speed                       | 1.2 ± 0.2           | 1.3 ± 0.2         | 1.1 ± 0.2        | <0.001          |
| SPPB (0-12 score)                     | 10.4 ± 1.5          | 10.5 ± 1.5        | 10.1 ± 1.5       | 0.001           |
| DXA Body Composition Measures         |                     |                   |                  |                 |
| Total Fat Mass (kg)                   | 38.0 ± 8.7          | 37.2 ± 8.1        | 41.1 ± 10.1      | <0.001          |
| Total Lean Mass (kg)                  | 53.2 ± 11.1         | 53.5 ± 11.6       | 52.0 ± 8.9       | 0.05            |
| Percentage Body Fat (%)               | 40.7 ± 7.1          | 40.2 ± 7.0        | 42.8 ± 7.0       | <0.001          |

Data presented as mean ± SD or n (%). Weight change categories are defined as: Weight Gain/Stability: <3% loss; Moderate Weight Loss: 3% to 7%; High Weight Loss: ≥7%. Abbreviations: BMI = body mass index; CVD = cardiovascular disease; DXA = dual energy x-ray absorptiometry; SPPB = short physical performance battery. Baseline samples sizes associated with individual outcome measures are as follows: Fast gait speed n=1245, SPPB n=853, and DXA-acquired body composition n=360.

**eTable 3.** Type III Tests of 3-Way Interactions for Sensitivity Analyses Involving Exercise

| <b>Six-Month Outcome</b> | <b>Interaction Variables</b>    | <b>Three-way Interaction <i>p</i>-value</b> |
|--------------------------|---------------------------------|---------------------------------------------|
| SPPB Change              | CR, Exercise, Sex               | 0.20                                        |
|                          | CR, Exercise, Race              | 0.55                                        |
|                          | % Weight Change, Exercise, Sex  | 0.67                                        |
|                          | % Weight Change, Exercise, Race | 0.72                                        |
| Gait Speed Change        | CR, Exercise, Sex               | 0.96                                        |
|                          | CR, Exercise, Race              | 0.52                                        |
|                          | % Weight Change, Exercise, Sex  | 0.77                                        |
|                          | % Weight Change, Exercise, Race | 0.99                                        |

Abbreviations: SPPB – Short Physical Performance Battery; CR – Assignment to Caloric Restriction. All models contain main effects of the stated interaction variables (3 terms), 2-way interactions (3 terms), and further adjustments for sex, age, race, study, education, BMI at baseline, diabetes history, hypertension history, cardiovascular disease history, and baseline values of the respective outcome. % Weight Change is modeled as a categorical variable, with weight gain/stability, moderate weight loss, and high weight loss categories represented.
